1 **Improved genome assembly and annotation for the rock pigeon (*Columba livia*)**

2

3 Carson Holt<sup>\*,†</sup>, Michael Campbell<sup>\*,1</sup>, David A. Keays<sup>‡</sup>, Nathaniel Edelman<sup>‡</sup>, Aurélie  
4 Kapusta<sup>\*,†</sup>, Emily Maclary<sup>§</sup>, Eric Domyan<sup>§,\*\*</sup>, Alexander Suh<sup>††</sup>, Wesley C. Warren<sup>‡‡</sup>,  
5 Mark Yandell<sup>\*,†</sup>, M. Thomas P. Gilbert<sup>§§,\*\*\*</sup>, Michael D. Shapiro<sup>§</sup>

6 \* Department of Human Genetics, University of Utah, Salt Lake City, UT, USA

7 † USTAR Center for Genetic Discovery, University of Utah, Salt Lake City, UT, USA

8 ‡ Research Institute of Molecular Pathology, Vienna, Austria

9 § Department of Biology, University of Utah, Salt Lake City, UT, USA

10 \*\* Department of Biology, Utah Valley University, Orem, UT, USA

11 †† Department of Evolutionary Biology (EBC), University of Uppsala, Uppsala, Sweden

12 ‡‡ Genome Institute at Washington University, St. Louis, MO, USA

13 §§ Natural History Museum of Denmark, University of Copenhagen, Copenhagen,  
14 Denmark

15 \*\*\* Norwegian University of Science and Technology, University Museum, 7491  
16 Trondheim, Norway

17 1 Current address: Division of Plant Biology, Cold Spring Harbor Laboratory, Cold  
18 Spring Harbor, NY, USA

19

20 **Accession numbers:**

21 BioProject: PRJNA167554

22 Genome: This Whole Genome Shotgun project has been deposited at

23 DDBJ/ENA/GenBank under the accession AKCR00000000. The version described in

24 this paper is version AKCR02000000.

25 RNAseq data: SAMN07417936, SAMN07417937, SAMN07417938, SAMN07417939,

26 SAMN07417940, SAMN07417941, SAMN07417942, SAMN07417943

27

28 **Running title:**

29 “HiRise genome assembly of rock pigeon”

30

31 **Keywords:**

32 *Columba livia*, rock pigeon, HiRise assembly, MAKER annotation

33

34 Author for Correspondence:

35 Michael D. Shapiro, Department of Biology, University of Utah, 257 S 1400 E, Salt Lake

36 City, UT 84108, [shapiro@biology.utah.edu](mailto:shapiro@biology.utah.edu), +1 801 581 5690

37

38 **Abstract**

39 The domestic rock pigeon (*Columba livia*) is among the most widely distributed and  
40 phenotypically diverse avian species. This species is broadly studied in ecology, genetics,  
41 physiology, behavior, and evolutionary biology, and has recently emerged as a model for  
42 understanding the molecular basis of anatomical diversity, the magnetic sense, and other  
43 key aspects of avian biology. Here we report an update to the *C. livia* genome reference  
44 assembly and gene annotation dataset (Cliv\_1.0). Greatly increased scaffold lengths in  
45 the updated reference assembly, along with an updated annotation set, provide improved  
46 tools for evolutionary and functional genetic studies of the pigeon, and for comparative  
47 avian genomics in general.

48

49 **Introduction**

50 Intensive selective breeding of the domestic rock pigeon (*Columba livia*) has resulted in  
51 over 350 breeds with extreme differences in morphology and behavior (Levi 1986;  
52 Domyan and Shapiro 2017). The large phenotypic differences among different breeds  
53 make them a useful model for studying the genetic basis of radical phenotypic changes,  
54 which are more typically found among different species rather than within a single  
55 species.

56

57 In genetic and genomic studies of *C. livia*, linkage analysis is important for identifying  
58 genotypes associated with specific phenotypic traits of interest (Domyan and Shapiro  
59 2017); however, short scaffold sizes in the Cliv\_1.0 draft reference assembly (Shapiro et  
60 al. 2013) hinder computationally-based comparative analyses. Short scaffolds also make

61 it more difficult to identify structural changes, such as large insertions or deletions, that  
62 are responsible for traits of interest (Domyan et al. 2014; Kronenberg et al. 2015).

63

64 Here we present the Cliv\_2.0 reference assembly and an updated gene annotation set. The  
65 new assembly greatly improves scaffold length over the previous draft reference  
66 assembly, and updated gene annotations show improved concordance with both  
67 transcriptome and protein homology evidence.

68

## 69 **Methods & Materials**

### 70 Genome sequencing and assembly

71 Genomic DNA from a female Danish tumbler pigeon (full sibling of the male bird used  
72 for the original Cliv\_1.0 assembly (Shapiro et al. 2013)) was used to produce long-range  
73 sequencing libraries using the “Chicago” (Putnam et al. 2016) method by Dovetail  
74 Genomics (Santa Cruz, CA). Two Chicago libraries were prepared and sequenced on the  
75 Illumina HiSeq platform to a final physical coverage (1-50 kb pairs) of 390x (see Table  
76 1).

77

78 Scaffolding was performed by Dovetail Genomics using HiRise assembly software and  
79 the Cliv\_1.0 assembly as input. Briefly, Chicago reads were aligned to the input assembly  
80 to identify and mask repetitive regions, and then a likelihood model was applied to  
81 identify mis-joins and score prospective joins for scaffolding. The final assembly was  
82 then filtered for length and gaps according to NCBI submission specifications.

83

84 Genome annotation

85 The pre-existing reference Gnomon (Souvorov et al. 2010) derived gene models for the  
86 Cliv\_1.0 assembly (GCA\_000337935.1) were mapped onto the updated Cliv\_2.0  
87 reference assembly using direct alignment of transcript FASTA entries. This was done  
88 using the alignment workflow of the genome annotation pipeline MAKER (Cantarel et al.  
89 2008; Holt and Yandell 2011), which first seeds alignments using BLASTN (Altschul et  
90 al. 1990) and then polishes the alignments around splice sites using Exonerate (Slater and  
91 Birney 2005). Results were then filtered to remove alignments that had an overall match  
92 of less than 90% of the original model (match is calculated as percent identity multiplied  
93 by percent end-to-end coverage).

94

95 For final annotation, MAKER was allowed to identify *de novo* gene models that did not  
96 overlap the aligned Gnomon models. Protein evidence sets used by MAKER included  
97 annotated proteins from *Pterocles gutturalis* (yellow-throated sandgrouse) (Zhang et al.  
98 2014) and *Gallus gallus* (chicken) (International Chicken Genome Sequencing 2004)  
99 together with all proteins from the UniProt/Swiss-Prot database (Bairoch and Apweiler  
100 2000; UniProt 2007). The transcriptome evidence sets for MAKER included Trinity  
101 (Grabherr et al. 2011) mRNA-seq assemblies from multiple *C. livia* breeds and tissues  
102 (methods for transcriptome assembly are described below). Gene predictions were  
103 produced within MAKER by Augustus (Stanke and Waack 2003; Stanke et al. 2008)  
104 trained against the Cliv\_1.0 Gnomon gene models. Repetitive elements in the genome  
105 were identified using a custom repeat library.

106

107 Custom repeat library

108 A repeat library for *C. livia* was built by combining libraries from existing avian species  
109 (Zhang et al. 2014) together with with repeats identified *de novo* for the Cliv\_2.0  
110 assembly. *De novo* repeat identification was performed using RepeatScout (Price et al.  
111 2005) with default parameters (>3 copies) to generate consensus repeat sequences.  
112 Identified repeats with greater than 90% sequence identity and a minimum overlap of 100  
113 bp were assembled using Sequencher (Yokouchi et al. 1993). Repeats were classified into  
114 transposable element (TE) families using multiple lines of evidence, including homology  
115 to known elements, presence of terminal inverted repeats (TIRs), and detection of target  
116 site duplications (TSDs). Homology-based evidence was obtained using RepeatMasker  
117 (Smit et al. 1996), as well as the homology module of the TE classifying tool RepClass  
118 (Feschotte et al. 2009). RepClass was also used to identify signatures of transposable  
119 elements (TIRs, TSDs). We then eliminated non-TE repeats (simple repeats or gene  
120 families), using custom Perl scripts (available at <https://github.com/4ureliek/ReannTE>).

121

122 In our custom repeat analysis, using the script ReannTE\_FilterLow.pl, consensus  
123 sequences were labeled as simple repeats or low complexity repeats if 80% of their length  
124 could be annotated as such by RepeatMasker (the library was masked with the option -  
125 noint). Next using the ReannTE\_Filter-mRNA.pl script, consensus sequences were  
126 interrogated against RefSeq (Pruitt et al. 2007) mRNAs (as of March 7th 2016) with  
127 TBLASTX (Altschul et al. 1990). Sequences were eliminated from the library when: (i)  
128 the e-value of the hit was lower than 1E-10; (ii) the consensus sequence was not  
129 annotated as a TE; and (iii) the hit was not annotated as a transposase or an unclassified

130 protein. The script ReannTE\_MergeFasta.pl was then used to merge our library with a  
131 library combining RepeatModeler (Smit and Hubley 2008) outputs from 45 bird species  
132 (Kapusta et al. 2017) and complemented with additional avian TE annotations  
133 (International Chicken Genome Sequencing 2004; Warren et al. 2010; Bao et al. 2015).  
134 Merged outputs were then manually inspected to remove redundancy, and all DNA and  
135 RTE class transposable elements were removed and replaced with manually curated  
136 consensus sequences.

137

### 138 Transcriptomics Methods

139 RNA was extracted from adult tissues (brain, retina, subepidermis, cochlear duct, spleen,  
140 olfactory epithelium) of the racing homer breed, and one whole embryo each of a racing  
141 homer and a parlor roller (approximately embryonic stage 25 (Hamburger and Hamilton  
142 1951)). RNA-seq libraries were prepared and sequenced using 100-bp paired-end  
143 sequencing on the Illumina HiSeq 2000 platform at the Research Institute of Molecular  
144 Pathology, Vienna (adult tissues), and the Genome Institute at Washington University, St.  
145 Louis (embryos). RNA-seq data generated for the Cliv\_1.0 annotation were also  
146 downloaded from the NCBI public repository for *de novo* re-assembly. Accession  
147 numbers for the public data are SRR521357 (Danish tumbler heart), SRR521358 (Danish  
148 tumbler liver), SRR521359 (Oriental frill heart), SRR521360 (Oriental frill liver),  
149 SRR521361 (Racing homer heart), and SRR521362 (Racing homer liver).

150

151 Each FASTQ file was processed with FastQC ([http://www.bioinformatics.babraham.ac.  
152 uk/projects/fastqc/](http://www.bioinformatics.babraham.ac.uk/projects/fastqc/)) to assess quality. When FastQC reported overrepresentation of

153 Illumina adapter sequences, we trimmed these sequences with fastx\_clipper from the  
154 FASTX-Toolkit ([http://hannonlab.cshl.edu/fastx\\_toolkit/](http://hannonlab.cshl.edu/fastx_toolkit/)). We used FASTX-Toolkit for  
155 two additional functions: runs of low quality bases at the start of reads were trimmed with  
156 fastx\_trimmer when necessary (quality cutoff of -Q 33), and reads were then trimmed  
157 with fastq\_quality\_trimmer (-Q 33). Finally, each pair of sequence files was assembled  
158 with Trinity (Grabherr et al. 2011) version r20131110 using the --jaccard\_clip option.

159

#### 160 Linkage map construction and anchoring to current assembly

161 Genotyping by sequencing (GBS) data was generated, trimmed, and filtered as previously  
162 described (Domyan et al. 2016). Reads were mapped to the Cliv\_2.0 assembly using  
163 Bowtie2 (Langmead and Salzberg 2012). Genotypes were called using Stacks (Catchen et  
164 al. 2011), with a minimum read-depth cutoff of 10. Thresholds for automatic corrections  
165 were set using the parameters --min\_hom\_seqs 10, --min\_het\_seqs 0.01, --max\_het\_seqs  
166 0.15. Sequencing coverage and genotyping rate varied between individuals, and birds  
167 with genotyping rates in the bottom 25% were excluded from map assembly.

168

169 Genetic map construction was performed using R/qtl ([www.rqtl.org](http://www.rqtl.org)) (Broman et al.  
170 2003). For autosomal markers, markers showing segregation distortion (Chi-square,  $p <$   
171 0.01) were eliminated. Sex-linked scaffolds were assembled and ordered separately, due  
172 to differences in segregation pattern for the Z-chromosome. Z-linked scaffolds were  
173 identified by assessing sequence similarity and gene content between pigeon scaffolds  
174 and the Z-chromosome of the annotated chicken genome (Ensembl Gallus\_gallus-5.0).

175



176 Pairwise recombination frequencies were calculated for all autosomal and Z-linked  
177 markers. Missing data were imputed using “fill.geno” with the method “no\_dbl\_XO”.  
178 Duplicate markers were identified and removed. Within individual scaffolds, R/Qtl  
179 functions “droponemarker” and “calc.errorlod” were used to assess genotyping error.  
180 Markers were removed if dropping the marker led to an increased LOD score, or if  
181 removing a non-terminal marker led to a decrease in length of >10 cM that was not  
182 supported by physical distance. Individual genotypes were removed if they showed with  
183 error LOD scores >5 (Lincoln and Lander 1992). Linkage groups were assembled from  
184 2960 autosomal markers and 232 Z-linked markers using the parameters (max.rf 0.1,  
185 min.lod 6). In the rare instance that single scaffolds were split into multiple linkage  
186 groups, linkage groups were merged if supported by recombination frequency data; these  
187 instances typically reflected large physical gaps between markers on a single scaffold.  
188 Scaffolds in the same linkage group were manually ordered based on calculated  
189 recombination fractions and LOD scores.

190

191 To compare the linkage map to the prior assembly (Cliv\_1.0), each 90-bp locus  
192 containing a genetic marker was parsed from the Stacks output file  
193 “catalogXXX\_tags.tsv” and queried to the Cliv\_1.0 assembly using Nucleotide-  
194 Nucleotide blast (v2.6.0+) with the parameters `-max_target_seqs 1 -max_hsp 1.3175` of  
195 the 3192 loci (99.47%) from the new assembly had a BLAST hit with an E-value < 4e-24  
196 and were retained.

197

198 *Data availability*

199 This Whole Genome Shotgun project has been deposited at DDBJ/ENA/GenBank under  
200 the accession AKCR00000000. The version described in this paper is version  
201 AKCR02000000. RNA-seq data are deposited in the SRA database with the BioSample  
202 accession numbers SAMN07417936-SAMN07417943. Assembly and RNA-seq data are  
203 publicly available in NCBI databases under BioProject PRJNA167554.

204

## 205 **Results and Discussion**

206 The final reference assembly is 1,108,534,737 base pairs in length and consists of 15,057  
207 scaffolds (Table 1). A total of 1,015 scaffolds contain a gene annotation. Completion  
208 analysis of the assembly using BUSCO (Simao et al. 2015) suggests that Cliv\_2.0 is  
209 72.9-86.2% complete which is nearly identical to the Cliv\_1.0 assembly estimate of 72.3-  
210 86.4% (Table 2). Thus, we found no significant changes to assembly completeness  
211 between the two assemblies. The major improvement to the Cliv\_2.0 assembly is rather  
212 an increase in scaffold length (Fig. 1a). Overall, the N50 scaffold length increased to 14.3  
213 megabases compared to 3.15 megabases for the previous reference assembly, a greater  
214 than 4-fold increase. Recently, Damas et al. (Damas et al. 2017) used computational  
215 methods and universal avian bacterial artificial chromosome (BAC) probes to achieve  
216 chromosome-level scaffolding using the Cliv\_1.0 assembly as input material; however,  
217 this assembly is currently unannotated.

218

219 The new assembly joins scaffolds that we knew were adjacent but were separated  
220 previously (see Table S1 for full catalog of positions of the original assembly in the new  
221 assembly, and Table S2 for full catalog of breaks in the original assembly to form the

222 new assembly). For example, we previously determined that Cliv\_1.0 Scaffolds 70 and  
223 95 were joined based on genetic linkage data from a laboratory cross (Domyan et al.  
224 2016). These two sequences are now joined into a single scaffold in the Cliv\_2.0  
225 assembly (see Table S3 for positions of genetic markers in Cliv\_1.0 and Cliv\_2.0). At  
226 least one gene model (RefSeq LOC102093126), which was previously split across two  
227 contigs, has now been unified into a single model on a single scaffold.

228

229 The updated annotation set contains 15,392 gene models encoding 18,966 transcripts (see  
230 Table 3). This represents only a minor update of the reference annotation set as 94.7% of  
231 previous models were mapped forward nearly unmodified (90% exact match for 14,898  
232 out of 15,724 previous gene models) and only 494 new gene models were added to the  
233 Cliv\_2.0 annotation set (see Table 4).

234

235 The updated annotation set shows a modest improvement in concordance with aligned  
236 evidence datasets from mRNA-seq and cross species protein homology evidence relative  
237 to the Cliv\_1.0 set as measured by Annotation Edit Distance (AED) (Eilbeck et al. 2009;  
238 Holt and Yandell 2011). As a result, transcript models in the Cliv\_2.0 annotation tend to  
239 have lower AED values than the Cliv\_1.0 set (Figure 2; the CDF curve is shifted to the  
240 left). Lower AED values indicate greater model concordance with aligned transcriptome  
241 and protein homology data. Furthermore, the Cliv\_2.0 dataset displays greater transcript  
242 counts in every AED bin despite having slightly fewer transcripts overall compared to the  
243 Cliv\_1.0 dataset (Table S4). The higher bin counts indicate that lower AED values are

244 not solely a result of removing unsupported models from the annotation set, but rather  
245 suggest that evidence concordance has improved overall.

246

247 The improved scaffold lengths as well as updated gene model annotations should further  
248 empower ongoing studies to identify genes responsible for phenotypic traits of interest  
249 and improve detection of regions under selection due to longer scaffolds. We also expect  
250 to be able to better identify large deletions and other structural variants responsible for  
251 specific phenotypes now that they can be more clearly mapped to longer scaffolds.

252 Finally, the new transcriptomic data provides tissue-specific expression profiles for  
253 several adult tissue types and an important embryonic stage for the morphogenesis of  
254 limbs, craniofacial structures, skin, and other tissues.

255

## 256 **Acknowledgements**

257 We thank Dovetail Genomics for their aid in scaffolding the assembly, and Julia  
258 Carleton, and Anna Vickrey for technical support. This work was supported by National  
259 Science Foundation grant DEB1149160 and National Institutes of Health (NIH) grant  
260 R01GM115996 to MDS; NSF EAGER grant IOS 1561337 to MY; a European Research  
261 Council starting grant 336724 and Austrian Science Fund (FWF) grant Y726 to DAK;  
262 and European Research Council Consolidator grant 681396 to MTPG. We gratefully  
263 acknowledge research support from Boehringer Ingelheim at the Research Institute of  
264 Molecular Pathology, and support and resources from the Center for High Performance  
265 Computing at the University of Utah.

266

267

## 268 **References**

- 269 Altschul, S. F., W. Gish, W. Miller, E. W. Meyers, and D. J. Lipman. 1990. Basic Local  
270 Alignment Search Tool. *Journal of Molecular Biology* 215:403-410.
- 271 Bairoch, A. and R. Apweiler. 2000. The SWISS-PROT protein sequence database and its  
272 supplement TrEMBL in 2000. *Nucl. Acids Res.* 28:45-48.
- 273 Bao, W., K. K. Kojima, and O. Kohany. 2015. Repbase Update, a database of repetitive  
274 elements in eukaryotic genomes. *Mob DNA* 6:11.
- 275 Broman, K., H. Wu, S. Sen, and G. Churchill. 2003. R/qtl: QTL mapping in experimental  
276 crosses. *Bioinformatics* 19:889-890.
- 277 Cantarel, B. L., I. Korf, S. M. C. Robb, G. Parra, E. Ross, B. Moore, C. Holt, A. Sanchez  
278 Alvarado, and M. Yandell. 2008. MAKER: An easy-to-use annotation pipeline  
279 designed for emerging model organism genomes. *Genome Res.* 18:188-196.
- 280 Catchen, J. M., A. Amores, P. Hohenlohe, W. Cresko, and J. H. Postlethwait. 2011.  
281 Stacks: building and genotyping loci de novo from short-read sequences. *G3*  
282 1:171-182.
- 283 Damas, J., R. O'Connor, M. Farre, V. P. E. Lenis, H. J. Martell, A. Mandawala, K.  
284 Fowler, S. Joseph, M. T. Swain, D. K. Griffin, and D. M. Larkin. 2017.  
285 Upgrading short-read animal genome assemblies to chromosome level using  
286 comparative genomics and a universal probe set. *Genome Res* 27:875-884.
- 287 Domyan, E. T., M. W. Guernsey, Z. Kronenberg, S. Krishnan, R. E. Boissy, A. I.  
288 Vickrey, C. Rodgers, P. Cassidy, S. A. Leachman, J. W. Fondon, 3rd, M. Yandell,  
289 and M. D. Shapiro. 2014. Epistatic and combinatorial effects of pigmentary gene  
290 mutations in the domestic pigeon. *Curr Biol* 24:459-464.
- 291 Domyan, E. T., Z. Kronenberg, C. R. Infante, A. I. Vickrey, S. A. Stringham, R. Bruders,  
292 M. W. Guernsey, S. Park, J. Payne, R. B. Beckstead, G. Kardon, D. B. Menke, M.  
293 Yandell, and M. D. Shapiro. 2016. Molecular shifts in limb identity underlie  
294 development of feathered feet in two domestic avian species. *eLife* 5:e12115.
- 295 Domyan, E. T. and M. D. Shapiro. 2017. Pigeonetics takes flight: Evolution,  
296 development, and genetics of intraspecific variation. *Dev Biol* 427:241-250.
- 297 Eilbeck, K., B. Moore, C. Holt, and M. Yandell. 2009. Quantitative measures for the  
298 management and comparison of annotated genomes. *BMC Bioinformatics* 10:67.
- 299 Feschotte, C., U. Keswani, N. Ranganathan, M. L. Guibotsy, and D. Levine. 2009.  
300 Exploring repetitive DNA landscapes using REPCLASS, a tool that automates the  
301 classification of transposable elements in eukaryotic genomes. *Genome Biol Evol*  
302 1:205-220.
- 303 Grabherr, M. G., B. J. Haas, M. Yassour, J. Z. Levin, D. A. Thompson, I. Amit, X.  
304 Adiconis, L. Fan, R. Raychowdhury, Q. Zeng, Z. Chen, E. Mauceli, N. Hacohen,  
305 A. Gnirke, N. Rhind, F. di Palma, B. W. Birren, C. Nusbaum, K. Lindblad-Toh,  
306 N. Friedman, and A. Regev. 2011. Full-length transcriptome assembly from  
307 RNA-Seq data without a reference genome. *Nature biotechnology* 29:644-652.
- 308 Hamburger, V. and H. L. Hamilton. 1951. A series of normal stages in the development  
309 of the chick embryo. *Journal of Morphology* 88:49-92.

- 310 Holt, C. and M. Yandell. 2011. MAKER2: an annotation pipeline and genome-database  
311 management tool for second-generation genome projects. *BMC Bioinformatics*  
312 12:491.
- 313 International Chicken Genome Sequencing, C. 2004. Sequence and comparative analysis  
314 of the chicken genome provide unique perspectives on vertebrate evolution.  
315 *Nature* 432:695-716.
- 316 Kapusta, A., A. Suh, and C. Feschotte. 2017. Dynamics of genome size evolution in birds  
317 and mammals. *Proceedings of the National Academy of Sciences* 114:E1460-  
318 E1469.
- 319 Kronenberg, Z. N., E. J. Osborne, K. R. Cone, B. J. Kennedy, E. T. Domyan, M. D.  
320 Shapiro, N. C. Elde, and M. Yandell. 2015. Wham: Identifying Structural  
321 Variants of Biological Consequence. *PLoS Comput Biol* 11:e1004572.
- 322 Langmead, B. and S. L. Salzberg. 2012. Fast gapped-read alignment with Bowtie 2. *Nat*  
323 *Methods* 9:357-359.
- 324 Levi, W. M. 1986. *The Pigeon* (Second Revised Edition). Levi Publishing Co., Inc.,  
325 Sumter, S.C.
- 326 Lincoln, S. E. and E. S. Lander. 1992. Systematic detection of errors in genetic linkage  
327 data. *Genomics* 14:604-610.
- 328 Price, A. L., N. C. Jones, and P. A. Pevzner. 2005. De novo identification of repeat  
329 families in large genomes. *Bioinformatics* 21 Suppl 1:i351-358.
- 330 Pruitt, K. D., T. Tatusova, and D. R. Maglott. 2007. NCBI reference sequences (RefSeq):  
331 a curated non-redundant sequence database of genomes, transcripts and proteins.  
332 *Nucleic Acids Res*:D61 - 65.
- 333 Putnam, N. H., B. L. O'Connell, J. C. Stites, B. J. Rice, M. Blanchette, R. Calef, C. J.  
334 Troll, A. Fields, P. D. Hartley, C. W. Sugnet, D. Haussler, D. S. Rokhsar, and R.  
335 E. Green. 2016. Chromosome-scale shotgun assembly using an in vitro method  
336 for long-range linkage. *Genome Res* 26:342-350.
- 337 Shapiro, M. D., Z. Kronenberg, C. Li, E. T. Domyan, H. Pan, M. Campbell, H. Tan, C. D.  
338 Huff, H. Hu, A. I. Vickrey, S. C. Nielsen, S. A. Stringham, H. Hu, E. Willerslev,  
339 M. T. Gilbert, M. Yandell, G. Zhang, and J. Wang. 2013. Genomic diversity and  
340 evolution of the head crest in the rock pigeon. *Science* 339:1063-1067.
- 341 Simao, F. A., R. M. Waterhouse, P. Ioannidis, E. V. Kriventseva, and E. M. Zdobnov.  
342 2015. BUSCO: assessing genome assembly and annotation completeness with  
343 single-copy orthologs. *Bioinformatics* 31:3210-3212.
- 344 Slater, G. and E. Birney. 2005. Automated generation of heuristics for biological  
345 sequence comparison. *BMC Bioinformatics* 6:31.
- 346 Smit, A. F. and R. Hubley. 2008. RepeatModeler Open-1.0  
347 <http://www.repeatmasker.org/>.
- 348 Smit, A. F., R. Hubley, and P. Green. 1996. RepeatMasker Open-3.0  
349 <http://www.repeatmasker.org/>.
- 350 Souvorov, A., Y. Kapustin, B. Kiryutin, V. Chetvernin, T. Tatusova, and D. Lipman.  
351 2010. Gnomon – NCBI eukaryotic gene prediction tool. NCBI.
- 352 Stanke, M., M. Diekhans, R. Baertsch, and D. Haussler. 2008. Using native and  
353 syntenically mapped cDNA alignments to improve de novo gene finding.  
354 *Bioinformatics* 24:637-644.

- 355 Stanke, M. and S. Waack. 2003. Gene prediction with a hidden Markov model and a new  
356 intron submodel. *Bioinformatics* 19:ii215-225.
- 357 UniProt, C. 2007. The Universal Protein Resource (UniProt). *Nucleic Acids Res*:D193 -  
358 197.
- 359 Warren, W. C., D. F. Clayton, H. Ellegren, A. P. Arnold, L. W. Hillier, A. Kunstner, S.  
360 Searle, S. White, A. J. Vilella, S. Fairley, A. Heger, L. Kong, C. P. Ponting, E. D.  
361 Jarvis, C. V. Mello, P. Minx, P. Lovell, T. A. Velho, M. Ferris, C. N.  
362 Balakrishnan, S. Sinha, C. Blatti, S. E. London, Y. Li, Y. C. Lin, J. George, J.  
363 Sweedler, B. Southey, P. Gunaratne, M. Watson, K. Nam, N. Backstrom, L.  
364 Smeds, B. Nabholz, Y. Itoh, O. Whitney, A. R. Pfenning, J. Howard, M. Volker,  
365 B. M. Skinner, D. K. Griffin, L. Ye, W. M. McLaren, P. Flicek, V. Quesada, G.  
366 Velasco, C. Lopez-Otin, X. S. Puente, T. Olender, D. Lancet, A. F. Smit, R.  
367 Hubley, M. K. Konkel, J. A. Walker, M. A. Batzer, W. Gu, D. D. Pollock, L.  
368 Chen, Z. Cheng, E. E. Eichler, J. Stapley, J. Slate, R. Ekblom, T. Birkhead, T.  
369 Burke, D. Burt, C. Scharff, I. Adam, H. Richard, M. Sultan, A. Soldatov, H.  
370 Lehrach, S. V. Edwards, S. P. Yang, X. Li, T. Graves, L. Fulton, J. Nelson, A.  
371 Chinwalla, S. Hou, E. R. Mardis, and R. K. Wilson. 2010. The genome of a  
372 songbird. *Nature* 464:757-762.
- 373 Yokouchi, Y., M. Yamamoto, T. Toyota, H. Sasaki, and A. Kuroiwa. 1993. Regulatory  
374 interaction of positional signalings on coordinate expression of homeobox genes  
375 in developing limb buds. *Limb Development and Regeneration*. Wiley-Liss, Inc.
- 376 Zhang, G., B. Li, C. Li, M. T. Gilbert, E. D. Jarvis, J. Wang, and C. Avian Genome.  
377 2014. Comparative genomic data of the Avian Phylogenomics Project.  
378 *Gigascience* 3:26.  
379

380 **FIGURES**

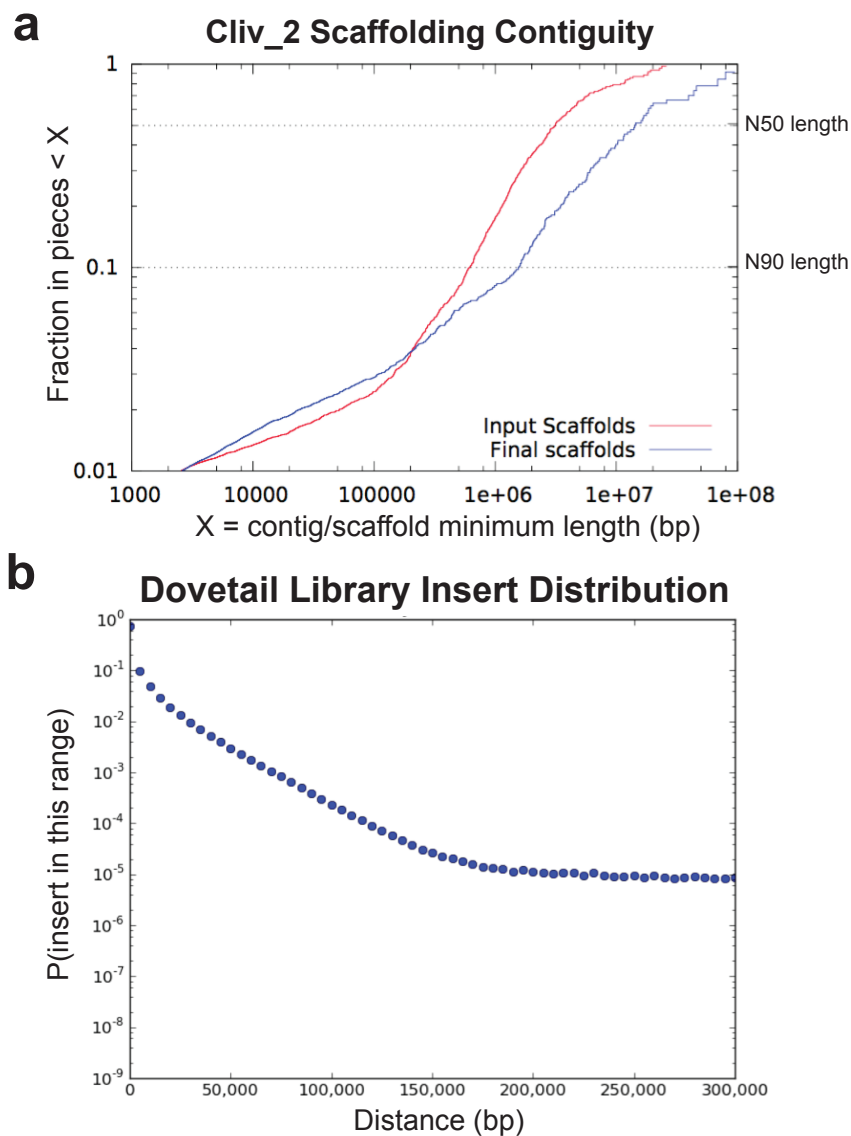

381

382 **Figure 1.** Assembly scaffolding contiguity and scaffolding library insert size

383 distributions. (a) Scaffolding comparison between Cliv\_1.0 (input scaffolds) and Cliv\_2.0

384 (final scaffolds) assemblies. (b) Distribution of Dovetail Genomics “Chicago” library

385 inserts.

386



387

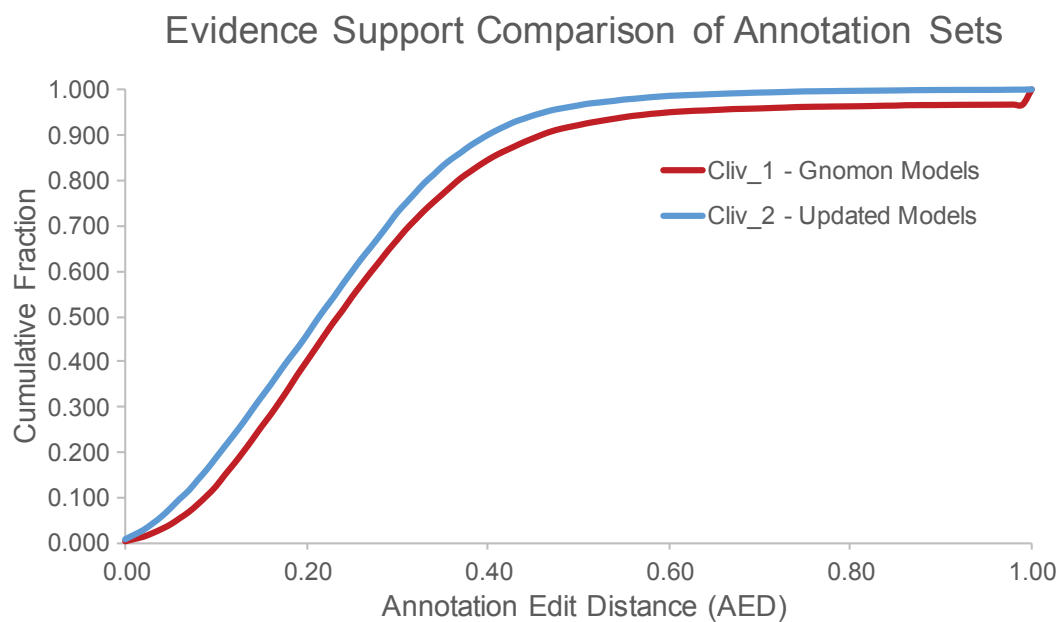

388

389

390 **Figure 2.** Evidence support comparison of annotation sets. Annotation edit distance  
391 (AED) support for gene models in Cliv\_2.0 (red line) is improved over Cliv\_1.0 (NCBI  
392 Gnomon annotation, blue line).

393

394

395

396

397 **TABLES**

**Table 1. Assembly statistics for Cliv\_2.0**

|                                    |                 |
|------------------------------------|-----------------|
| <i>Estimated Physical Coverage</i> | 389.7x          |
| <i>Total Length</i>                | 1,108,534,737bp |
| <i>Total scaffolds</i>             | 15,057          |
| <i>Total scaffolds &gt;1kb</i>     | 4,062           |
| <i>Total scaffolds &gt;10kb</i>    | 848             |

398

399

**Table 2. Assembly version comparison**

|                              | Cliv_1.0                  | Cliv_2.0                 |
|------------------------------|---------------------------|--------------------------|
| <i>Total Length</i>          | 1110.8Mb                  | 1110.9Mb                 |
| <i>N50 Length</i>            | 3.15Mb and 82 scaffolds   | 14.3Mb and 17 scaffolds  |
| <i>N90 Length</i>            | 0.618Mb and 394 scaffolds | 1.56Mb and 113 scaffolds |
| <i>Completeness Estimate</i> | 72.3-86.4%                | 72.9-86.2%               |

400

401

402

403

**Table 3. Annotation statistics**

|                          | Genes  | Transcripts |
|--------------------------|--------|-------------|
| <i>Total</i>             | 15,392 | 18,966      |
| <i>match<sup>a</sup></i> | 14,898 | 18,472      |
| <i>new</i>               | 494    | 494         |

<sup>a</sup> Count that match Cliv\_1.0 annotations with a value of at least 90% (match is calculated as % identity multiplied by % end-to-end coverage)

404

**Table 4. Annotation version comparison**

|                   | Cliv_1.0 | Cliv_2.0 |
|-------------------|----------|----------|
| Total Gene Models | 15,724   | 15,392   |
| <i>coding</i>     | 15,022   | 14,683   |
| <i>non-coding</i> | 702      | 709      |
| Total Transcripts | 19,585   | 18,966   |
| <i>coding</i>     | 18,569   | 18,148   |
| <i>non-coding</i> | 1016     | 818      |

405 **SUPPLEMENTAL TABLES**

406 **Table S1.** Tab-delimited table describing positions of Cliv\_1.0 scaffolds in the Cliv\_2.0  
407 scaffolds. The table has the following format: column 1, Cliv\_2.0 scaffold name; column  
408 2, Cliv\_1.0 sequence name; column 3, starting base (zero-based) of the Cliv\_1.0  
409 sequence; column 4, ending base of the Cliv\_1.0 sequence; column 5, orientation of the  
410 Cliv\_1.0 sequence in the Cliv\_2.0 scaffold, where (-) indicates that the Cliv\_2.0 scaffold  
411 sequence is reverse complemented relative to the Cliv\_1.0 assembly; column 6, starting  
412 base (zero-based) in the Cliv\_2.0 scaffold; column 7, ending base in the Cliv\_2.0  
413 scaffold.

414

415 **Table S2.** Tab-delimited table describing positions of breaks made in the Cliv\_1.0  
416 assembly to create the Cliv\_2.0 assembly. Data fields follow the same format that is used  
417 in Supplemental Table 1.

418

419 **Table S3.** Table describing the linkage map assembled from genotype-by-sequencing  
420 markers aligned to the Cliv\_2.0 assembly, and relative positions of aligned markers  
421 within the Cliv\_2.0 and Cliv\_1.0 genomes. The table has the following format: column 1,  
422 Linkage map marker ID; column 2, Linkage group ID; column 3, Linkage map position;  
423 column 4, Cliv\_2.0 scaffold name; column 5, starting base (zero-based) of the alignment  
424 in the Cliv\_2.0 scaffold; column 6, alignment orientation in the Cliv\_2.0 scaffold;  
425 column 7, Cliv\_1.0 scaffold name; column 8, starting base (zero-based) of the alignment  
426 the Cliv\_1.0 scaffold; column 9, alignment orientation in the Cliv\_1.0 scaffold.

427

428 **Table S4.** Tab-delimited table describing transcript count and CDF binned by Annotation  
429 Edit Distance (AED) values. AED is a modified sensitivity/specificity metric used to  
430 compare annotation datasets to each other or to aligned transcriptome and protein  
431 homology datasets. For calculating AED, sensitivity is defined as the fraction of a given  
432 reference overlapping a prediction and measures false negative rates. For our purposes,  
433 the prediction is a transcript model and the reference (or truth set) is a set of aligned  
434 transcriptome and protein homology evidence. We calculate sensitivity using the formula  
435  $SN = |p \cap r|/|r|$ ; where  $|p \cap r|$  represents the number overlapping nucleotides between the  
436 prediction and reference, and  $|r|$  represents the total number of nucleotides in the  
437 reference. Specificity is then defined as the fraction of a prediction overlapping a given  
438 reference, and it measures false positive rates. We calculate specificity using the formula  
439  $SP = |p \cap r|/|p|$ . We then define concordance to be the average of sensitivity and specificity  
440 ( $C = (SN+SP)/2$ ), and AED is 1 minus the concordance ( $AED = 1 - C$ ). Transcript models  
441 that have high AED values then show little concordance to aligned experimental  
442 evidence, and models with low AED values show high concordance.  
443
